# Supplementary material
Source: publisher figshare collection journal article supplement (https://karger.figshare.com/ndownloader/files/23898935)
Supplement: Supplementary file 1 [file 23898935]

**Table S2A.** Sub-analysis of the objective response rate

| **Characteristics** | **With**  **CR + PR** | **Without**  **CR + PR** | **P-value** |
| --- | --- | --- | --- |
| Age, y |  |  |  |
| < 70 | 5 | 13 | 0.4875 |
| ≥ 70 | 6 | 9 |  |
| Sex |  |  |  |
| Male | 7 | 18 | 0.6889 |
| Female | 4 | 6 |  |
| Smoking history |  |  |  |
| Yes | 6 | 18 | 0.2630 |
| No | 5 | 6 |  |
| Histology |  |  |  |
| Adenocarcinoma | 10 | 19 | 0.6399 |
| Non-adenocarcinoma | 1 | 5 |  |
| EGFR mutation |  |  |  |
| Wild type | 6 | 14 | 0.7136 |
| Mutant | 5 | 8 |  |
| Previous chemotherapy |  |  |  |
| Once | 10 | 17 | 0.3916 |
| Twice | 1 | 7 |  |

EGFR: epidermal growth factor receptor; CR: complete response; PR: partial response
